# Supplementary material for: Automated ArcticDEM iceberg detection tool: insights into area and volume distributions, and their potential application to satellite imagery and modelling of glacier-iceberg-ocean systems
Source: Copernicus journal article supplement (doi:10.5194/tc-2022-164), 2022-08-18
Supplement: Supplementary file [file tc-2022-164-AC1-supplement.pdf]

1 **Response to reviewer 1: ‘Automated ArcticDEM iceberg detection tool:**  
2 **insights into area and volume distributions, and their potential application to**  
3 **satellite imagery and modelling of glacier-iceberg-ocean systems’ by Shiggins**  
4 **et al.**

5 We would like to thank the reviewer for their comments which will help to improve the  
6 manuscript. Our responses to each of the major and minor comments raised and  
7 how we intend to address them for the revised version of the manuscript are outlined  
8 below. For this, reviewer comments are copied verbatim in blue, and our response to  
9 each is given in black. All line numbers quoted with the prefix L (e.g. L123) refer to  
10 those in the original submitted manuscript. All line numbers quoted with the prefix RL  
11 (e.g. RL123) refer to those in this response document.

12 **Main comments:**

13 1. Please can the authors comment on the two iceberg distributions found at two  
14 of their study sites? I thought the purpose of defining a threshold above sea  
15 level was to remove the chance of multiple bergs that are held together by  
16 melange being detected as single icebergs. But in your results (e.g. Figures 7  
17 and 8) you present two distributions for SKJI and KNS. You suggest that  
18 Distribution 2 does in-fact represent bergs frozen together by melange.  
19 Should the threshold above sea-level therefore be increased, to remove this  
20 phenomenon? You would then only retrieve a single distribution per study  
21 site.

- 22 • Whether a user wishes to obtain data including iceberg rafts or  
23 individual icebergs will be dependent on their definition of an iceberg  
24 within their research question. The approach presented in the  
25 manuscript allows users to choose whether iceberg raft data are  
26 retained or not through the definition of the threshold above sea level  
27 value for iceberg identification. For example, if only iceberg outlines are  
28 desired, a higher threshold above sea level could be defined by the  
29 user. By doing so, distribution 2 (iceberg rafts) would not be identified.  
30 However, a higher threshold would mean that smaller icebergs with  
31 lower freeboard heights may be missed. Conversely, if the user’s  
32 research question requires all iceberg *and* iceberg raft cover from an  
33 ROI, results in the manuscript show that a lower threshold (e.g. 1.5m)  
34 will provide such data. A further alternative approach is that the iceberg  
35 raft distribution could be separated from the iceberg distribution as part  
36 of user post-processing (e.g. Figure 8 insets). The examples provided  
37 in the manuscript show the flexibility of the iceberg detection workflow  
38 depending on the type of iceberg data they wish to obtain (Figure 5).

- 39 • To address this comment we will clarify that the research question  
40 being investigated is crucial for defining the iceberg detection threshold  
41 by inserting at L502: ‘If a user’s research question requires both  
42 iceberg and iceberg raft cover (distributions 1 and 2) within an ROI, the  
43 default threshold of 1.5 m above sea level is suitable, as is the 3.0 m  
44 threshold for more densely ice covered fjords such as SKJI. If only  
45 iceberg outlines are needed, a higher detection could be defined to  
46 remove iceberg rafts (distribution 2). It should be noted that setting a

47 higher detection threshold would result in the potential loss of data  
48 relating to smaller icebergs which have lower freeboard heights, and  
49 fractionally lower iceberg volumes obtained from larger icebergs. An  
50 alternative approach that would retain smaller icebergs and not result  
51 in the minor under-estimation of iceberg volume would be to use a  
52 lower threshold (e.g. 1.5 or 3 m), with data from distributions 1 and 2  
53 separated as part of post-processing (e.g. Figure 8 insets).’

54 2. The authors make a couple of references to this method having the potential  
55 to be upscaled across the full continent. However, they also suggest that  
56 there would need to be good enough data coverage for this. Please can the  
57 authors clarify whether there is enough data for pan-Arctic application or not?

- 58 • We have created a draft supplementary figure (see Draft Figure 1  
59 below) which shows the coverage of ArcticDEM strip data on the pan-  
60 Arctic scale using locations identified as marine terminating glaciers for  
61 non-ice sheet and ice sheet glaciers (from the Randolph Glacier  
62 Inventory (RGI) v6 and Goliber et al. (2022) respectively). The map has  
63 been created by identifying the footprints of ArcticDEM strip data where  
64 there is overlap within 5 km of the point locations provided by Goliber  
65 et al. (2022) for Greenland, and having any overlap with RGI glacier  
66 outlines whose metadata show them as being either lake terminating,  
67 marine terminating or shelf terminating. This figure will be included as  
68 supplementary data in the revised manuscript. However, as RGI data  
69 use a benchmark of glacier outlines observed at near to 2000 as  
70 possible and some glaciers have now retreated into proglacial lakes  
71 (e.g. in Iceland) or changed their terminal environments, this map may  
72 not include ArcticDEM coverage of these glaciers. Consequently, we  
73 have also created summary maps showing all ArcticDEM data  
74 coverage irrespective of whether they cover glaciers or not.
- 75 • To allow users to get a quick impression of data availability for a given  
76 ROI we have now included new functionality within the GUI to view a  
77 series of summary maps showing ArcticDEM coverage. This includes:
  - 78 1. Map showing July-October coverage for known calving glaciers  
79 (Draft Figure 1; i.e. data least likely to be affected by solid  
80 melange/sea ice).
  - 81 2. Map showing all ArcticDEM coverage for known calving glaciers  
82 irrespective of acquisition time.
  - 83 3. Map showing all ArcticDEM coverage from the entire dataset  
84 irrespective of whether a glacier is thought to be there or not.
  - 85 4. As map 3, but for the months July-October.
- 86 • Further functionality to allow users to filter DEMs by month of  
87 acquisition has also been added to the GUI. The analysis workflow for  
88 this revised GUI has otherwise not been changed. The revised GUI for  
89 inclusion can be accessed at the following link:  
90 ([https://code.earthengine.google.com/ad11c00c37b7ad88e28c4493ee  
91 6eec64](https://code.earthengine.google.com/ad11c00c37b7ad88e28c4493ee6eec64)).
- 92 • It is worth noting that these maps show where ArcticDEM data are  
93 available irrespective of the quality of the DEM data. Consequently,  
94 they do not indicate that all of the DEMs will be of sufficient  
95 quality/coverage to allow it to be used for analysis.

96  
97  
98  
99

- The above will be clarified in the text (at L163) and as part of the GitHub read.me walkthrough (<https://github.com/ConnorShiggins/Google-Earth-Engine-and-icebergs>).

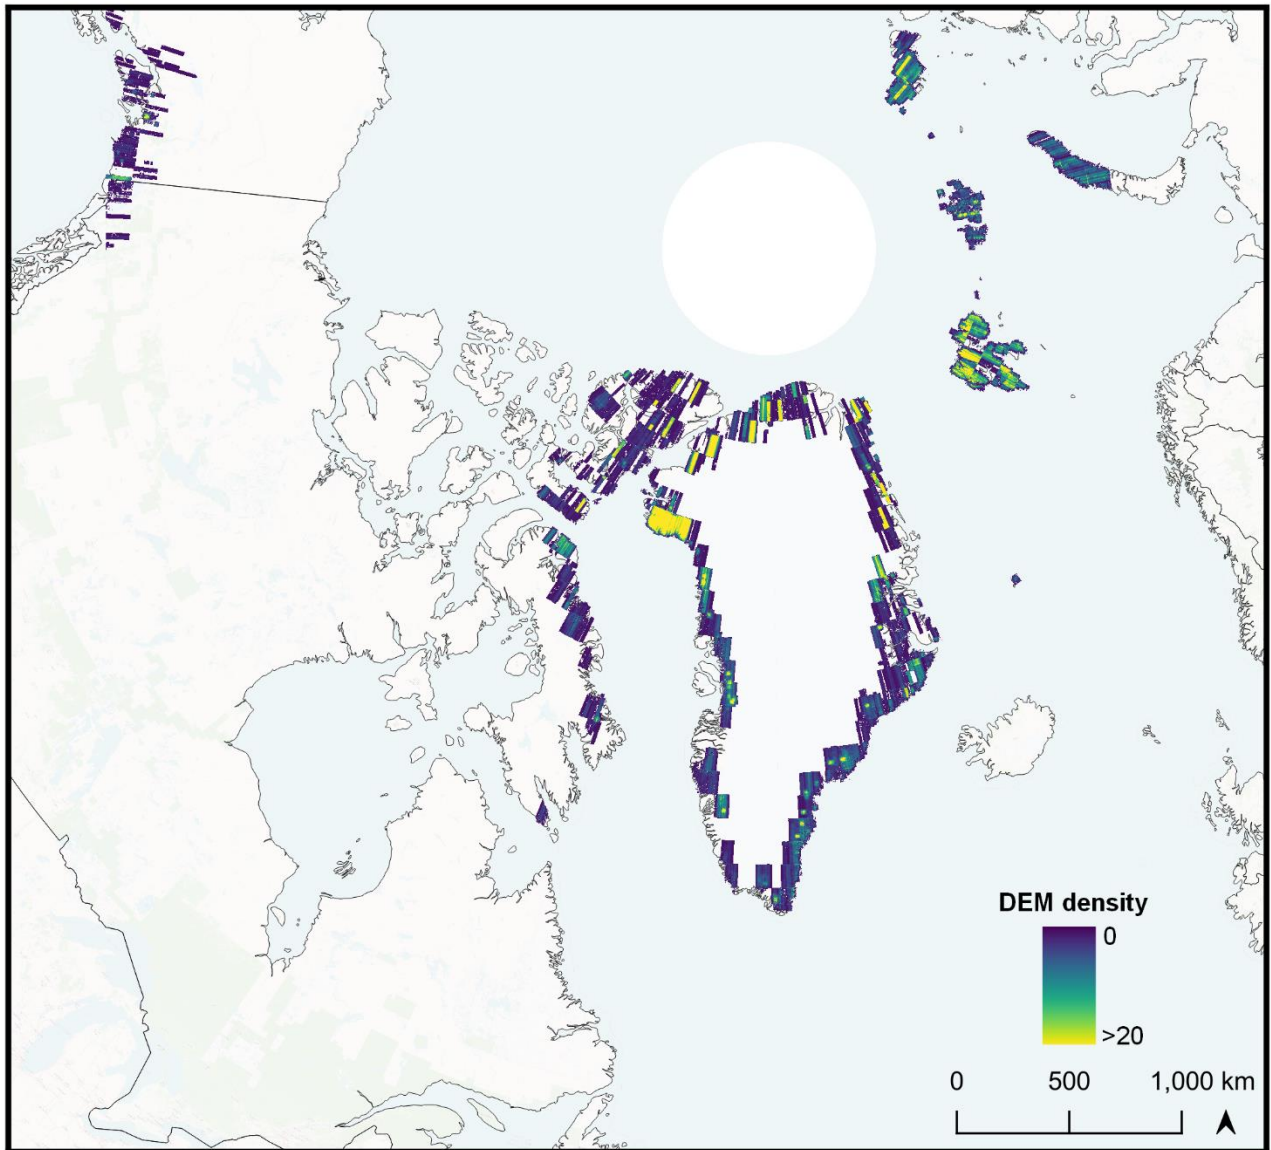

100 *Draft figure 1. Google Earth Engine ArcticDEM v3 strip data availability (July-*  
101 *October) for Greenland’s calving margins (Goliber et al., 2022) and the extent of all*  
102 *marine/lake/shelf terminating glaciers extent in the remainder of the Arctic (RGI v6;*  
103 *Pfeffer et al., 2014).*

- 104 3. It would be good to see some figures showing what the DEM data looks like.  
105 You may have readers who have not worked with the Arctic DEM before, and  
106 it makes your workflow hard to understand without seeing some  
107 visualisations. Please can the authors add a figure (or two) where they deem  
108 it most appropriate.

109 We will replace our figure location maps that used Sentinel-2 imagery with hillshaded  
110 ArcticDEM data to provide readers with an indication as to what the DEM data look  
111 like. See below for the new draft location figure to replace Figure 1.

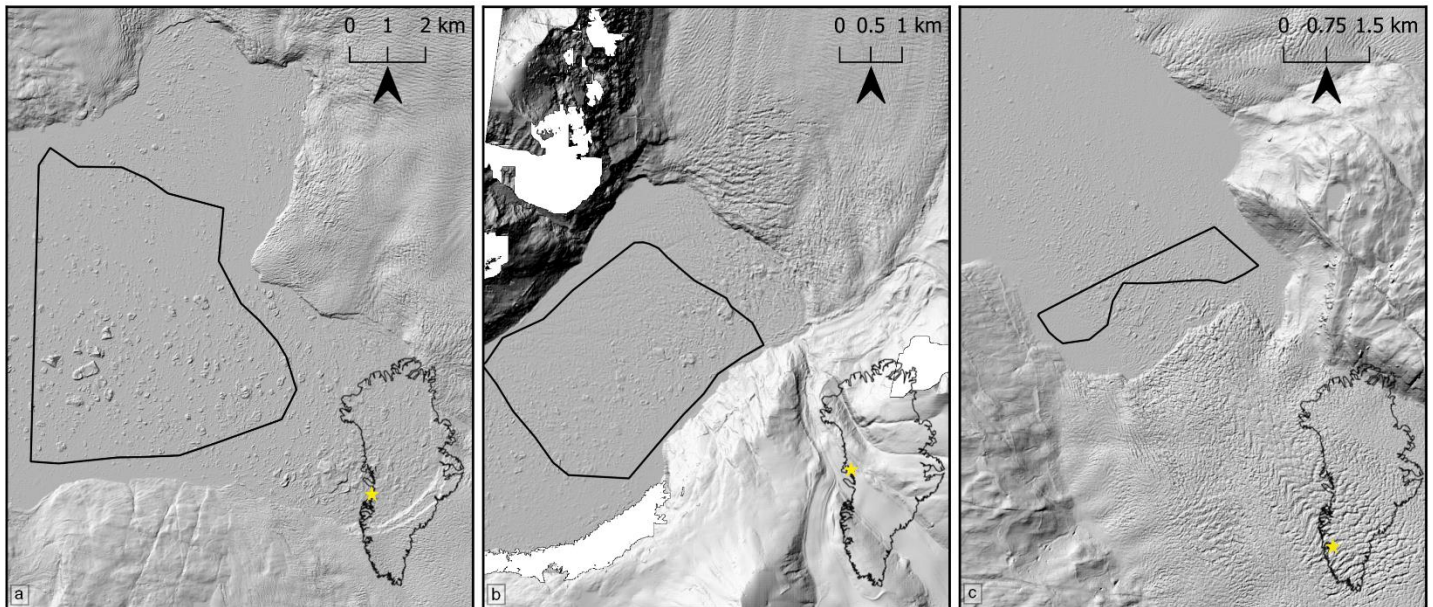

112 *Draft figure 2. New location maps for the study sites with changed imagery*  
113 *(ArcticDEM from Sentinel-2) and ROI outlines in black.*

114 4. Please can the authors double check that all results that they present have an  
115 equivalent section within the results section. Readers new to the topic need to  
116 fully understand (and even be able to recreate) how you take a 3-D DEM and  
117 produce area to volume conversions (for example).

- 118 • After reviewing the manuscript in response to this comment, we believe  
119 all the data presented has a section within the results and discussion.  
120 With regards to reproducing our area-to-volume conversion  
121 relationships (Figure 7), all that is required is a power law relationship  
122 between the two variables (in this case area and volume) which was  
123 followed from previously published work (Sulak et al., 2017). We will  
124 provide the basic Python script which calculates the bin mean of each  
125 size class (area and volume) on the same GitHub read.me for users.  
126 All code produced by the authors that is used to post-process the  
127 output data, and the output data itself will be appended as  
128 supplementary data files in the revised manuscript. This will allow  
129 readers to both reproduce our results and workflow for other ROIs.

130 **Specific comments:**

131 1. (L15): Do you mean the GEE task run time is 6 minutes? Make this clearer.

132

- 133 • The execution output time noted in the abstract is for the 3 glaciers which  
134 range from 6 minutes to 2 hours. We will clarify this in the revised manuscript  
135 (at L15 to L16).

136 2. (L25): Is there sufficient data coverage for a pan-Antarctic study? If not, I probably  
137 wouldn't say this.

138 • We assume the reviewer means the Arctic rather than Antarctic, though we  
139 provide responses relevant for each pole. For the Arctic, the new  
140 Supplementary Figure 1 (RL100) clarifies that pan-Arctic coverage is  
141 theoretically possible given the nominal availability of ArcticDEM data strips.  
142 However, a precise assessment of this would not be possible without  
143 performing the analysis itself, which is beyond the scope of this paper. For  
144 Antarctica, though similar strip data to ArcticDEM are available through  
145 REMA, the Antarctic is not the focus of this study. Anecdotally, from the  
146 experience of the authors using REMA versus ArcticDEM strip data available  
147 in Google Earth Engine, coverage and geolocation accuracy of the former  
148 tend to be poorer than those of ArcticDEM, posing challenges to pan-Antarctic  
149 application. The above will be clarified in the revised manuscript at L25.

150 3. (L30): Do you have a reference for shipping?

151 • The reference for shipping is Bigg (2015) (at L31).

152 4. (L33): add a 'that' after suggested

153 • This will be changed in the revised manuscript.

154 5. (L37): I don't think this sub-heading is necessary, especially as it captures all most  
155 all of your introductory material anyway.

156 • This will be removed from the introduction in the revised manuscript.

157 6. (L41): hyphenate 'Sentinel-2'

158 • This will be changed in the revised manuscript.

159 7. (L44): If CNN makes using optical imagery 'better', what is its disadvantage? Why  
160 do you need to use your method instead?

161 7. (L44): If the next paragraph is an attempt to address this, just make the link  
162 between paragraphs clearer.

163 • Convolution neural networks (CNNs) can be difficult to construct, requiring  
164 substantial training data that are often obtained from manual labelling of  
165 images. This can be computationally and user time intensive, while different  
166 training data used within the same CNN architecture will also provide different  
167 results. Though CNNs can produce high quality data (e.g. Rezvanbehbahani  
168 et al., 2020), the quality of data produced are highly contingent on the quality  
169 and range of their training data. The potential transferability of CNNs for  
170 iceberg detection beyond individual study locations and across different image  
171 illumination conditions remain relatively untested. Many CNNs are also not  
172 necessarily deterministic, so may also provide different results given identical  
173

174 training data and CNN architectures. Additionally, CNNs using optical/radar  
175 satellite imagery will still be limited to only expressing a planform surface  
176 area, rather than a volume. Consequently, volumetric data can only be  
177 estimated through empirically derived area-volume conversions such as those  
178 presented in this manuscript (Equations 2 to 6).

- 179 • The approach presented in this manuscript using ArcticDEM data therefore  
180 offers advantages over CNNs in that our workflow is deterministic, applicable  
181 over wide areas, and can provide fully reproducible data of both iceberg areas  
182 *and* volumes. To address these comments, we will include mention in L44-45  
183 regarding the difficulty of applying CNNs over large spatial scales.

184 8. (L53): replace 'are' with 'is'

- 185 • This will be changed in the revised manuscript.

186 9. (L99): hyphen needed between 'Sentinel' and '2'. Check elsewhere.

- 187 • This will be changed in the revised manuscript.

188 10. (L100): would there be a limit to this? If we kept using data with a finer spatial  
189 resolution I assume there would come a point where the  $x_{min}$  would stop  
190 decreasing?

- 191 • This is an interesting point which could be considered in future work using  
192 satellite imagery of different spatial scales and/or resampling individual high-  
193 resolution images to coarser resolutions. Though it would be possible to  
194 speculate that there may be a “minimum  $x_{min}$  value”, we do not wish to do so  
195 here without data that explicitly supports this conclusion. As this would require  
196 substantial further analysis and is not an aim of the paper, we do not think it is  
197 possible to make such an assertion in this manuscript.

198 11. (L106): Do you want to identify ice bergs frozen together by melange though? I  
199 thought you wanted to avoid this and just wanted to identify individual icebergs?

- 200 • See response to main point 1 (RL13).

201 12. (L111): What makes the data suitable?

- 202 • Suitable data for constraining iceberg freshwater fluxes ideally require  
203 knowledge of an iceberg’s volume and area (i.e. knowledge that could be  
204 parameterised within a fjord model to estimate how much freshwater could  
205 potentially be melted into the fjord and at what rate). Additionally, assumptions  
206 in numerical models are currently made regarding an iceberg distribution (e.g.  
207 power law slope = -1.8 to -2.0; Davison et al., 2020). To clarify what makes  
208 iceberg data observations suitable for inclusion in fjord models, we will add a  
209 sentence at L112 stating: "Models that include quantification of iceberg  
210 meltwater flux currently make assumptions regarding iceberg area/volume  
211 distributions within fjords, though direct observations of these from DEM or 2D  
212 satellite data are currently rarely available."

213 13. (L129): Tidy up these figures where possible. The 'a' 'b' 'c' labels, north arrows,  
214 and scale bars would be better on a white background rather than a translucent  
215 background. Could you also make all the ROI outlines either green or red?

- 216 • Draft Figure 2 has been created in response to main comment 3 (RL04 ). This  
217 has been changed to show examples of ArcticDEM imagery and the ROI  
218 outlines have been changed to black for colour accessibility and consistency.

219 14. (L133): I would say this bounding box is green? Comment on the subset map  
220 also.

- 221 • Colour will be changed to black. See Draft Figure 2.

222 15. (L136): '-1' needs to be in superscript

- 223 • This will be changed in the revised manuscript.

224 16. (L145): what do you mean by this?

- 225 • This will be rephrased to: 'The terminus depth of the glacier ranged from 230-  
226 500 m between 2013 and 2015 (Morlighem et al., 2017).

227 17. (L167): Is this enough to draw robust conclusions from?

- 228 • While 3 images at UI is less than at SKJI and KNS, the absolute number of  
229 observations and quality of data remains a substantial improvement on  
230 manual digitisation (e.g. 6,973 icebergs identified at UI for 3 images versus  
231 712 icebergs manually delineated from 8 DEMs in Sulak et al. (2017)).

232 18. (L177): what if the ROI is dominated by sea ice, and there is little open water?

- 233 • The analysed DEMs are limited to between July and October of every year,  
234 minimising the likelihood that rigid melange and/or sea ice will be present at  
235 the glacier terminus. This means that the most frequent elevation in an  
236 individual DEM for these months is likely to be at or very near to the local sea  
237 level. Where continuous, solid sea/fjord ice cover dominates a scene the  
238 reviewer is correct that this may result in an over-estimation of sea level within  
239 the workflow. The value of the derived sea level is currently appended to  
240 observations exported from the workflow as metadata, allowing users to  
241 potentially filter data with anomalously high sea level values during post-  
242 processing. The requirement to do this will be contingent on a user's research  
243 question. This will be clarified in the text at L177-178.

244 19. (L181): In the text (above) you state that the filters are replied in the opposite  
245 order. Correct either the figure or text.

- 246  
247 • This will be changed in the revised manuscript.  
248

249 20. (L182): Adding colours to this figure would help to differentiate between steps,  
250 rather than, or in addition to, different steps. However, at the moment, I cant work out  
251 why some steps are encased in different shapes?

252

- 253 • We did not use colour in the first version of the manuscript for accessibility  
254 (e.g. colour blindness). The workflow steps are encased by different shapes  
255 because they represent different elements of the code. In the revised  
256 manuscript, we will add the meaning of each shape in the figure caption at  
257 L183 as follows: 'Each step of the workflow is encased by different shapes  
258 representing different processes in the code, i.e. ovals = the beginning and  
259 end of the workflow; the inverse trapezoid = a manual requirement; italicised  
260 parallelograms = data inputs; rectangles with inset lines = predefined filter  
261 processes; and rectangles = code processes. We will also add a legend to the  
262 figure indicating what each shape indicates.

263

264 21. (L188): Would it not have still been better to have worked in 0.1m increments  
265 here too?

266

- 267 • The increments of 0.5 m at SJKI only resulted in a small variation of 0.04  
268 across all values of the threshold (1 to 5 m) as shown in Figure 5d.  
269 Consequently, these increments resulted in small absolute variation in power  
270 law slopes, meaning that it would be unnecessary to use increments smaller  
271 than 0.5 m at SKJI. We will state on L188 in the revised manuscript that:  
272 'There are small variations (~0.04) in the power law slopes at SKJI across all  
273 detection thresholds tested, demonstrating a relative lack of sensitivity of  
274 power law slope to threshold value used.'

275

276 22. (L195): I would argue this information is implicit in binary, but I suppose you are  
277 stating which values represent what.

278

- 279 • Yes, we wanted to ensure readers who may not be aware of binary images  
280 understood the process behind the iceberg detection.

281

282 23. (L199): From your figure I can see that you export results to Google Drive, is  
283 there an option to export results as GEE assets?

284

- 285 • Yes, it is possible to export output to GEE assets within the workflow during  
286 the export stage. An explanation of how to do this will be added to the GitHub  
287 readme.

288

289 24. (L205): How did you get to these values, did you conduct any form of testing?

290

- 291 • These values fall within the known  $x_{min}$  values from previously published work  
292 (e.g. Scheick et al., 2019, Rezvanbehbahani et al., 2020). This will be clarified  
293 in the revised manuscript (at L205).

294 25. (L210): rather than this, just state the areas of the three ROIs.

- 295 • This will be changed in the revised manuscript.



296 26. (L213): This is vague. If they are quantitatively comparable, please provide the  
297 statistics.

- 298 • We can add the Pearson's r-values in brackets in the main text if required,  
299 though these values are also given in Figure 3.

300 27. (L217): Some of this info could probably be placed in supplementary info, then  
301 this table will be a bit less crowded.

- 302 • We think all the data presented in Table 1 is necessary and provides useful  
303 information for readers to refer to in the main manuscript without the need to  
304 access supplementary files. We therefore propose to retain data presented in  
305 the submitted manuscript for the revised version.

306 28. (L225): ???

- 307 • The 225-line number has entered table 1 accidentally when formatting and will  
308 be corrected.

309 29. (L235): Increase size of axis font.

- 310 • This will be changed in the revised manuscript.

311 30. (L240): Please include a description of the statistics in this table in your methods  
312 section. I know it may seem obvious, but the methods for any result obtained should  
313 be provided.

- 314 • The Pearson's r-value is stated in Figure 3 and the respective caption. We will  
315 add to the methods that we used the Pearson's r-value to gauge the strength  
316 of relationship between the automated and manual delineations (at L207).

317 31. (L250): Please increase the size of the scale bars here so that they are legible.

- 318 • This will be changed in the revised manuscript.

319 32. (L266): This is a stylistic preference, but I would re-write this sentence so that  
320 you are always saying 'sea level ranged from' or X's 'range was' rather than mixing  
321 between the two.

- 322 • This will be changed for the revised manuscript, and we will endeavour to  
323 ensure consistency of language used throughout.

324 33. (L272): Please increase size of font on axis

- 325 • This will be changed in the revised manuscript.

326

327 34. (L296): Please re-write this sentence to make it clearer. At first I thought you  
328 were saying the y axis with their log scales were different, but they are not

- 329 • We will remove the word 'normalised' from the caption and clarify that the y-  
330 axis log scales are not different.

331 35. (L302): Do you know which of these scenarios is actually true from visual  
332 interpretation of data?

- 333 • In retrospect, we feel this point might be better suited in the discussion (at  
334 L485) and it will therefore be moved to expand on the comment made.

335 36. (L310): Please increase font sizes.

- 336 • This will be changed in the revised manuscript.

337 37. (L323): State what the black lines represent, and perhaps make them red/ blue  
338 so the reader can see whether they are linked to the manual or automated dataset.

- 339 • The black lines represent the lines of best fit for the icebergs in each  
340 distribution of the manual and automated approaches and we will clarify this in  
341 the figure legend and caption in the revised manuscript (at L329). On drafting  
342 a version of the figure where the colour of lines matched the data points we  
343 find that this reduces the clarity of the figure as we are unable to visually  
344 discriminate between data points and the lines of best fit. While admittedly not  
345 ideal, we propose to retain the lines of best fit as black.

346  
347 38. (L331): Please can you better describe the methods used to achieve this in the  
348 methods section.

- 349  
350 • In the methods we will add a sentence at L207 saying 'New equations for the  
351 conversion of iceberg area to volume are derived from the resulting iceberg  
352 datasets. These are expressed as power laws to provide consistency with  
353 previously published work (e.g. Sulak et al., 2017).'

354 39. (L341): how do you define small / large? Can this be quantified?

- 355 • We define the separation between small and large icebergs as  $1000 \text{ m}^2$ , as  
356 that is consistent with Rezvanbehbahani et al.'s (2020) definition. We mention  
357 this later in the manuscript (L457), but we will refer to this directly in the  
358 revised manuscript at L341.

359 40. (L376): Maybe place this figure after you have mentioned the two distributions,  
360 as currently I see this figure and the contents do not make sense until later in the  
361 text.

- 362 • If the manuscript reaches copy-editing stage, we will ensure that the figure is  
363 placed at an appropriate point within the paper to reflect this comment.

364 41. (L395): What are you trying to say here? It is unclear to me. Please re-write.

- 365 • This will be reframed as: 'By calculating mean iceberg area and volume for  
366 binned increments of  $\log_{10}(X+0.1)$ , this reduced the potential for biasing the  
367 overall area-volume relationship towards smaller, more frequently observed  
368 icebergs.'

369 42. (L424): Please increase font sizes

- 370 • This will be changed in the revised manuscript.

371 43. (L463): Given that the legend is the same for each of these subfigures, you could  
372 probably just put it on one subfigure. I would keep it in (c) and remove it from (a) and  
373 (b)

- 374 • To avoid any potential for ambiguity, we suggest that it is appropriate to retain  
375 the legends in each subplot.

376 44. (L465): The last bit of the caption here (stating the count vs volume of small  
377 icebergs) isn't really something that belongs in the figure caption, it should be in the  
378 text.

- 379 • We will insert this section of the figure caption into the text on L460.

380 45. (L474): Please can you comment on data availability? Does it allow for pan-Arctic  
381 application?

- 382 • See response to main comment 1 (RL13) and minor comment 2 (RL136).  
383

384 46. (L475): rephrase to 'is quick to execute'

- 385 • This will be changed in the revised manuscript.

386 47. (L476): change to defining

- 387 • This will be changed in the revised manuscript.

388 48. (L483): I assume you mean a mismatch between manually delineated and  
389 automatically delineated icebergs? If so, please make this a bit clearer.

- 390 • We will clarify this point by stating the automatic approach only analyses  
391 whole pixels (L484). See also response to minor point 49 (RL398) in this  
392 review, and RL184 in response to Reviewer 2 minor point 12.

393 49. (L485): Please clarify what you are saying here. Do you mean to say that the  
394 manual classifications over estimate iceberg size relative to the automated  
395 classifications?

- 396 • Yes, we will clarify this in the revised manuscript by stating: 'The automated  
397 approach identifies icebergs through analysis of whole pixels, rather than the

398 manual delineation which will have iceberg outlines digitised across pixels' (at  
399 L485).

400 50. (L486): Is figure 4 actually showing hillshaded DEMs? If so please state this in  
401 the caption and proximal text.

- 402 • Yes, the DEMs in figure 4 are hillshaded with the detected icebergs shaded  
403 with their respective outlines. In the revised manuscript we will add this to the  
404 Figure 4 caption that they are hillshaded, and we will also change the colour  
405 scheme to allow the hillshading to be seen more clearly by readers.

406 51. (L520): Please can the authors comment on this? I thought the purpose of the  
407 threshold set for height above sea level was used in order to prevent the detection of  
408 multiple icebergs 'stuck together' by melange? Surely at these two study sites you  
409 need to increase the threshold, and then you would only get one iceberg population?

- 410 • We wanted to highlight in the manuscript that it is possible for the workflow to  
411 identify different iceberg distributions present in the fjord. The user definition  
412 of the threshold above sea level allows flexibility for the user to obtain data  
413 most relevant for their research question (i.e. it is possible to derive separate  
414 relationships for rafted and non-rafted icebergs). The section as written  
415 illustrates that the workflow allows flexibility for this. Our response to the  
416 reviewer's main comment 1 (RL13) will also help to clarify the point raised  
417 here.
