# Supplementary material for: Automated ArcticDEM iceberg detection tool: insights into area and volume distributions, and their potential application to satellite imagery and modelling of glacier-iceberg-ocean systems
Source: Copernicus journal article supplement (doi:10.5194/tc-2022-164), 2022-08-18
Supplement: Supplementary file [file tc-2022-164-AC2-supplement.pdf]

1 **Response to reviewer 2: ‘Automated ArcticDEM iceberg detection tool:**  
2 **insights into area and volume distributions, and their potential application to**  
3 **satellite imagery and modelling of glacier-iceberg-ocean systems’ by Shiggins**  
4 **et al.**

5 We would like to thank Till Wagner for their comments which will help to improve the  
6 manuscript. Our responses to each of the major and minor comments raised and  
7 how we intend to address them for the revised version of the manuscript are outlined  
8 below. For this, reviewer comments are copied verbatim in blue, and our response to  
9 each is given in black. All line numbers quoted with the prefix L (e.g. L123) refer to  
10 those in the original submitted manuscript. All line numbers quoted with the prefix RL  
11 (e.g. RL123) refer to those in this response document.

12 **Main comments:**

13 1. Availability of ArcticDEMs and picking the right ROI. I was able to run the  
14 code on SKJI without much trouble and could also approximately reproduce  
15 some of the distributions in the paper (e.g. something similar to those in Fig  
16 6). However, when I tried to explore other random glaciers around Greenland  
17 I struggled to find ones with any available ArcticDEM scenes. I randomly tried  
18 ~10 or so glaciers in different regions and only 2 identified any ArcticDEM  
19 scenes (2 scenes each) for the ROIs that I picked. It was not clear to me from  
20 the manuscript how exactly to pick the ROIs and I tried to emulate the shapes  
21 provided in Fig 1 but realized I had no further knowledge how these were  
22 determined. This may be part of the reason why I couldn't detect more DEM  
23 scenes. I was also struck by the fact that picking slightly different ROIs in front  
24 of SKJI resulted in detecting a different number of scenes and also in  
25 somewhat different slopes for the area distributions. I appreciate that a  
26 comprehensive account of where ArcticDEM scenes are available may be  
27 beyond the scope of this study, but the lack of information in this regard limits  
28 the utility of the product. Relatedly, it would be helpful to have some practical  
29 guidance of how to draw the ROI polygons to best harness the strengths of  
30 the algorithm. Finally, a discussion of how much the results depend on the  
31 number of scenes available would be helpful. This could for example be  
32 explored by running the analysis on subsets of the SKJI scenes and showing  
33 the resulting spread in power law slopes, or similar?

- 34
- 35 • We appreciate the reviewer undertaking comprehensive testing of the tool as  
36 it is extremely useful to gain feedback on its usability for those encountering it  
37 for the first time. With regards to the definition of the polygon for the ROI,  
38 there is a GitHub read.me (<https://github.com/ConnorShiggins/Google-Earth-Engine-and-icebergs>) available which is included in the text of the manuscript.  
39 This includes a walkthrough on how to define the ROI. However, after these  
40 comments, we will clarify in the text of the revised manuscript that this tutorial  
41 exists for users wanting to obtain a dataset (at L169).
  - 42 • With respect to the point raised regarding how slightly different ROI definition  
43 impacts results, as suggested by the reviewer we have conducted analysis on  
44 3 ROI subsets for SKJI in front of the northern, central and southern regions  
45

46 of the glacier (see Draft Figure 3). For the northern branch, results from 18  
47 DEMs available returned a power law slope of -2.03, the middle ROI with 30  
48 DEMs returned a power law slope of -1.95, and the southern branch subset  
49 had 4 DEMs available returning a power law slope of -1.78. Consequently,  
50 there is some variation in both image availability and the  $\alpha$  value for each  
51 section of the fjord. Understanding what is driving this localised variability is  
52 poorly understood and certainly deserves detailed study in and of itself.  
53 However, given the potential for changing calving styles through time and  
54 variation in space of calving dynamics in front of each terminus region, it is not  
55 possible to say here whether these differences arise from data availability or  
56 differences in fjord/glacier dynamics. Such analysis would require detailed  
57 understanding and analysis of individual glacier dynamics and their spatial  
58 and temporal variability, which we suggest is beyond the scope of this study.

- 59 • As commented upon by the reviewer and highlighted in the response above,  
60 choosing different ROIs can lead to variation in the number of DEMs available  
61 for analysis. This is especially noticeable at SJKI as the terminus is over 40  
62 km long and ArcticDEM strips rarely cover the entire fjord region. We also  
63 note that this is likely to have most significant impact on glaciers with long  
64 margins (e.g. SKJI, Humboldt, 79N), and will have less of an impact on termini  
65 in narrower (e.g. ~2-10 km wide) fjords. To potentially increase data  
66 availability across an ice front, the filter threshold defining the lower limit of  
67 ROI coverage can be lowered to allow more DEMs to be taken forward for  
68 subsequent analysis (default is 80% or 0.8 in the workflow). This is defined in  
69 line 220 of the code with a variable name '*imageAreaCoverage*'. However,  
70 doing so may lead to less accurate definition of sea level for each image. To  
71 clarify this, we will add discussion of Draft Figure 3 in the main text at L503,  
72 and will provide full instructions and caveats as part of the GitHub readme. It  
73 should also be noted that the new GUI functionality included in response to  
74 Reviewer 1's main comment 2 (RL54) will allow users to get an indication of  
75 how much ArcticDEM data may be available for different glaciers across the  
76 Arctic region.

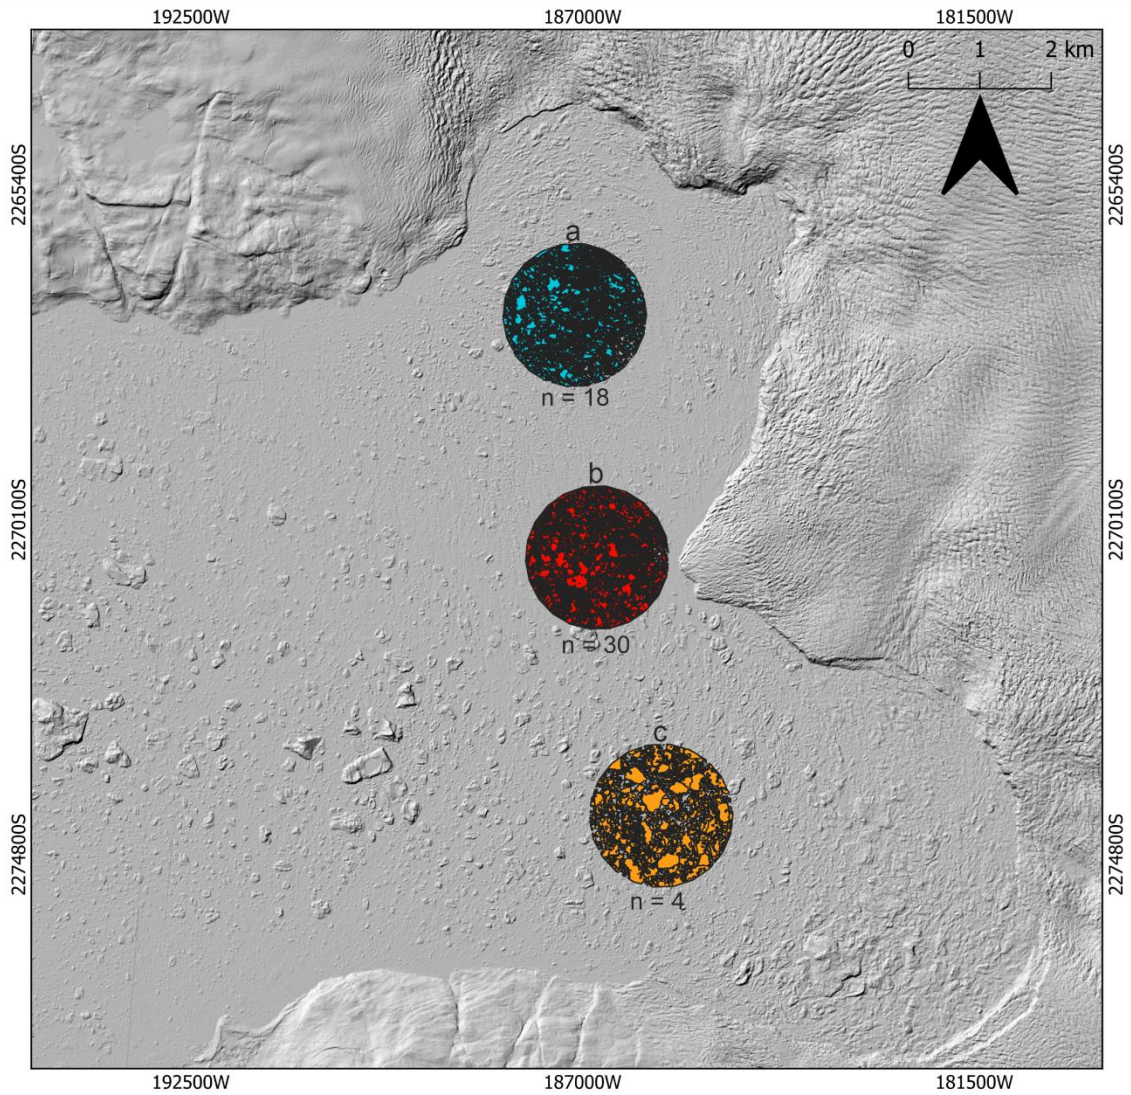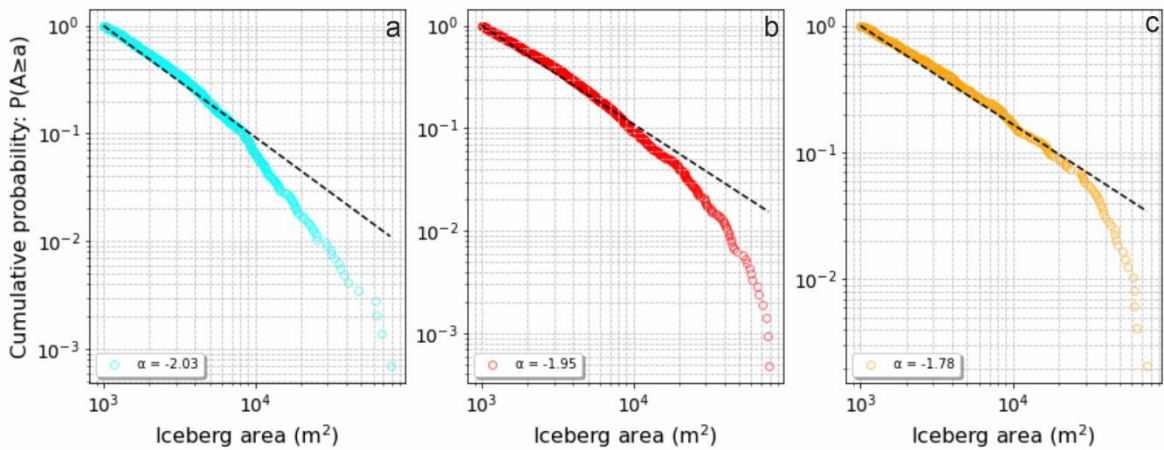

77 *Draft figure 3. Subset sampling across the ice front at SKJI to determine*  
 78 *distributional changes depending on the data available. The power laws are below*  
 79 *and respective to their position in the fjord by letter and colour. The 'n' is the number*  
 80 *of ArcticDEM scenes in the image collection of the detected icebergs.*

81

82 2. Degree of automation. There are a couple of user inputs which are not  
83 straight-forward to set, namely the ROIs (see comment above) and the  
84 elevation threshold. The elevation threshold seems to be somewhat of a  
85 complex issue (see also the other reviewer's comments about distinguishing  
86 rafted vs non-rafted iceberg clusters). However, from looking at Fig 5 it looks  
87 like key statistics such as iceberg frequencies and the power law slope are  
88 not overly sensitive to this threshold, and I was wondering whether a 1.5m  
89 cutoff could simply be applied to all glaciers (including SKJI) at least in the  
90 paper, with a discussion that one may want to adjust this for certain purposes  
91 (such as focusing on the specific distribution of small icebergs); I am such  
92 mostly suggesting a minor reframing of the language here. As an alternative  
93 (and more involved) approach, one could come up with an optimization  
94 scheme that picks the threshold for each glacier depending on specific output  
95 statistics? Relatedly, it would help clean up the presentation if a single  $x_{\min}$   
96 could be picked for the glaciers in the paper (with an accompanying  
97 discussion analogous to the one for the elevation threshold)? As a minor point  
98 I would suggest removing the word "fully" from I.12.

- 99
- 100 • Using different thresholds above sea level for different glaciers illustrates the  
101 flexibility of the workflow and allows users to change it depending on their  
102 research question. In the manuscript we aimed to show examples of this by  
103 varying the detection threshold and expanding on the circumstances in which  
104 it is appropriate to do so (at L481-483). We will add to this discussion a small  
105 paragraph (at L496) which outlines how changing the detection threshold may  
106 alter the icebergs detected (e.g. a higher detection threshold will result in  
107 fewer small icebergs being delineated), and highlight that instructions on how  
108 to do this are in the GitHub read.me. An optimisation scheme for setting a  
109 detection threshold was something we did consider, however it would require  
110 multiple iterations of computationally intensive parts of the code across all  
111 available ArcticDEM strips in order to maintain consistency of data output. We  
112 therefore decided against implementing this option in order to retain code  
113 efficiency, data consistency, and the speed with which users can obtain  
114 outputs.
- 115 • While we agree that being able to define a single  $x_{\min}$  for all the glaciers would  
116 be ideal, doing so would risk severely limiting data available for analysis. For  
117 example, setting an  $x_{\min}$  at UI and KNS equal to that at SKJI would result in  
118 KNS and UI losing approximately 30% of iceberg observations. This would  
119 lead to potential over-estimation of how large the iceberg distributions are for  
120 these glaciers. The difference in calving styles and overall iceberg size  
121 distributions at each glacier also raise questions as to whether applying  
122 similar  $x_{\min}$  values at each site is appropriate. Again, such a choice can be  
123 made by the user during post-processing depending on the research question  
124 under investigation (i.e. what range of iceberg sizes are users interested in).  
125 In light of this comment, we will clarify in the text that these are the specific  
126 reasons different  $x_{\min}$  values are defined (at L506).
- 127 • We will also replace the word 'fully' on L12 with "highly".

128 **Specific comments:**

129 1. (L.59): is solar illumination also a limiting factor for the DEMs?

- 130 • Solar illumination does not impact the ArcticDEM data itself, though will have  
131 impacted whether the WorldView data used to construct the DEMs could be  
132 used for DEM generation. Given that this manuscript does not generate the  
133 DEM data from WorldView imagery, but instead uses the ArcticDEM strips  
134 that are available (and which retain no solar illumination related metadata), we  
135 do not include solar illumination as a limiting factor for analysis of the DEMs.

136 2. (L.69): "iceberg area distribution" vs L.70 "area-size distributions" I presume this  
137 refers to the same thing, so maybe pick one?

- 138 • We will choose 'iceberg area distribution', and endeavour to ensure that we  
139 make use of consistent language in this and other cases throughout the  
140 revised manuscript.

141 3. (L.70): Just a side note: we also used such size distributions to look at iceberg  
142 decay in Antarctica in England et al "Modeling the breakup of tabular icebergs".  
143 Science Advances 6.51 (2020): eabd1273. This was based on the Antarctic size  
144 distributions in Tournadre et al "Antarctic icebergs distributions 1992-2014". J.  
145 Geophys. Res. Oceans 121, 327–349 (2016). You may not want to bring in Antarctic  
146 references here, so feel free disregard this comment.

- 147 • Thank you for highlighting these works and we appreciate the comment.  
148 Research in Antarctica is of course relevant and we will add these references  
149 to the revised manuscript (at L73).

150 4. (L.75): I suggest explicitly stating what "x" represents (surface area in  $m^2$  (?)). I  
151 was also wondering whether "a" or "A" may be better since "x" often refers to a  
152 distance and since in the vert. axis label of Fig 6 you write " $P(A>a)$ ", so if you stick  
153 with "x" you may want to adjust this label.

- 154 • We will adjust this label as suggested in the revised manuscript.

155 5. (L.88): maybe add "([as discussed] in Scheick et al., 2019)", otherwise it reads as  
156 if Scheick et al were misrepresenting the data

- 157 • This will be changed in the revised manuscript.

158 6. (L.91): "determine" instead of "interrogate" (?)

- 159 • This will be changed in the revised manuscript.

160 7. (L.102): Similar to the comment on Scheick et al.: it is not quite clear whether  
161 Sulak et al were among the few studies to directly estimate iceberg volume (maybe  
162 just move the reference to right after "few studies"?)

- 163 • We will move the reference to the suggested position in the revised  
164 manuscript.

165 8. (L.140): maybe clarify over which time period this retreat happened?

- 166 • The time period of the retreats (2000-2002 and 2013-2015 respectively) will  
167 be added in the revised manuscript (at L142).

168 9. (L184-194) (see also general comment 2): this reads a little like picking the right  
169 threshold is more of an art than a science. I'd suggest reframing this a bit.

- 170 • Yes, it is correct that choosing the “correct” threshold is somewhat of a  
171 subjective choice on the part of the user. However, this can be informed by  
172 prior knowledge of iceberg density. For example, if glaciers are known to have  
173 particularly dense melange cover dominated by large icebergs (e.g. SKJI,  
174 Helheim, Kangerlussuaq), a higher threshold may be more appropriate.  
175 Where there is dense melange cover with smaller icebergs (e.g. KNS), or  
176 where there is typically open water, then lower thresholds will produce more  
177 comprehensive data (i.e. more likely to include small icebergs and/or iceberg  
178 rafts). To address this comment we will explicitly flag on L496 that discussion  
179 of this point is raised later in the paper, as mentioned in our response to main  
180 comment 2 (RL82).

181 10. (L.210): 5.3 "km<sup>2</sup>" to 41 "km<sup>2</sup>"

- 182 • Thank you for spotting this and we will update.  
183

184 11. (Table 1): How are the uncertainties in the power slopes calculated? There also  
185 seems to be a rogue "-" after 8.629 (and the misplaced line number 225). Out of  
186 mere curiosity I was wondering whether there is much of a seasonal fluctuation in  
187 any of these statistics? I guess you only have summer DEMs?

- 188 • The uncertainties are generated using a Python power law package (Alsott et  
189 al., 2014), and the uncertainty is calculated as one standard deviation of the  
190 residuals of the relationship between iceberg area or volume versus  
191 frequency. This will be clarified in the text on L217.
- 192 • We will remove the rogue “-”, as well as the misplaced line number.
- 193 • A very interesting point regarding seasonal fluctuations, but as correctly  
194 noted, we only use DEMs between July and October to avoid rigid melange  
195 and seasonal ice tongues where the workflow has higher risk of returning  
196 erroneous data. This is already flagged to the reader on L164-165, though the  
197 implications of this will also be reiterated in the discussion at L477 in the  
198 revised manuscript.

199 12. (Fig 3): The automated and manually detected volume sums for KNS are almost  
200 identical, much closer than for the other two - yet their power law slopes (Fig 6c) are  
201 more divergent than for the other two glaciers. Could you comment on that? I also  
202 noted that SKJI has a rather large % difference in manually and automatically  
203 detected iceberg volume. Could you comment on why that is and why we need not  
204 be concerned about that (or should we)?

- 205 • The percentage difference at SKJI between the automated and manual  
206 methods arise as a result of the manual user not identifying smaller icebergs

207 in the DEM (discussed L484-485). Also, given that the automated approach  
208 performs analysis on a per pixel basis, whereas a manual delineation is  
209 almost certain to cross pixels, the automated approach is more likely to  
210 provide a more accurate characterisation of iceberg areas and be unaffected  
211 by manual user digitisation error (either through user under-estimation of  
212 extent, or over-estimation through failure to separate out adjoining icebergs).  
213 User digitisation error will also have a proportionately greater impact on  
214 smaller icebergs and is most likely to account for the mismatches in power  
215 law slope values observed (e.g. Figures 3 and 6). It is challenging to  
216 disentangle whether these small differences arise from user digitisation error  
217 or workflow error given that the definition of an iceberg margin is somewhat  
218 subjective and will vary between users. To avoid potential for bias in manual  
219 digitisation, we will also note that these were performed by a single operator  
220 (at L484). To clarify each of the points above, we will add to the discussion at  
221 L487.

222 13. (Fig 5 and Fig 6.): The given value for alpha (KNS) in Fig 6c is -2.38, while the  
223 KNS alpha values range from -2.1 to -2.3, and close to -2.25 for threshold = 1.5m.  
224 Why is there this discrepancy?

225 • The data presented in figure 5 includes all the data for KNS (i.e. all icebergs  
226 from 16 images), while the data presented in Figure 6c for validation is based  
227 on data from a subset region of a single image. It was necessary to use a  
228 subset of an image for validation as comprehensive manual digitisation of  
229 entire scenes is impractical. The differences in alpha values for KNS between  
230 Figure 5 and Figure 6c therefore arises from the latter representing the  
231 iceberg distribution of KNS at a single point in time for only part of its fjord.  
232 This will be noted in the text (at L506) as a point alongside discussion of main  
233 point 1 (RL43-58) regarding how subset areas of ROIs can influence the  
234 values of power law slopes (Draft figure 3).

235 14. (Fig 6): I was initially confused that the slopes on the log-log plots of figure 6  
236 have are approx 1, whereas alpha =~ 2. I then realized that you are plotting CDF and  
237 the slope for a CDF = alpha -1. Maybe this could be noted in the text or caption?

238 • We will note this in the caption in the revised manuscript.

239 15. (Fig 7): The 5th and 95th percentile are given as power law relationships, for  
240 which I would have expected straight (dashed) lines in the figure, but the lines are  
241 somewhat wiggly. Why is that?

242 • The 5<sup>th</sup> and 95<sup>th</sup> percentile lines are not straight because the data values are  
243 derived from the binned ranges of  $\log_{10}(x+0.1)$  increments. Adding on lines of  
244 best fit for the percentiles made the plots too crowded, and obscured the data.  
245 The area-volume relationships given in the text for the 5<sup>th</sup> and 95<sup>th</sup> percentiles  
246 (Equations 5 and 6) are based on the lines of best fit that have been derived  
247 for these binned mean values. We will clarify this point in the text (at L341),  
248 and in the figure caption in the revised manuscript.

249 16. (Fig 8): The resolution of this fig is somewhat low (also the horizontal label of  
250 panel a is cut off?)

- 251 • We can remake this figure ensuring a better resolution and thank you for  
252 noticing the x-axis on the subplot being cut off.

253 17. (Fig 9): horizontal axis label: "iceberg area (m<sup>2</sup>)" (not increments)

- 254 • This will be changed in the revised manuscript.

255 18. (L.487): delete "is achievable" (or "it is able")

- 256 • This will be changed in the revised manuscript.

257 19. (L.542): I would suggest replacing "excellent" with "good" (?)

- 258 • This will be changed in the revised manuscript.
